# Supplementary material for: Distribution grid impacts of electric vehicles: A California case study
Source: PubMed Central journal article supplement (PMC8749456; doi:10.1016/j.isci.2021.103686), 2021-12-28
Supplement: mmc1.pdf [file mmc1.pdf]

**iScience, Volume 25**

**Supplemental information**

**Distribution grid impacts of electric  
vehicles: A California case study**

**Alan Jenn and Jake Highleyman**

# Supplemental Information

## Supplemental Figures

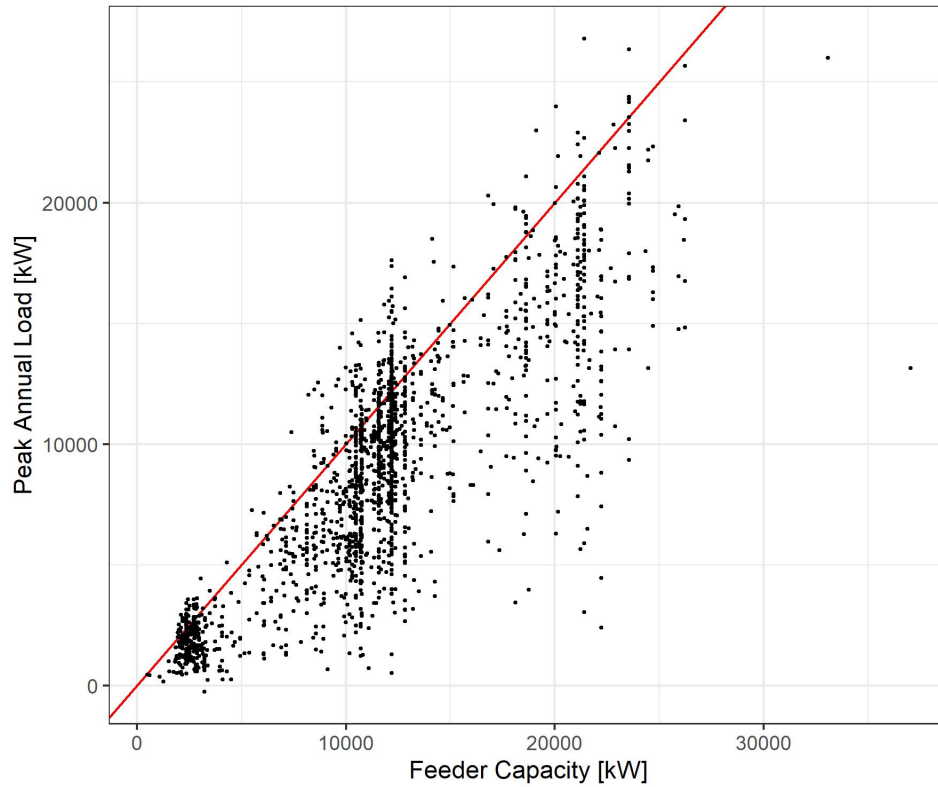

*Figure S1: Feeder capacities versus the peak annual load observed on each corresponding feeder for all feeder circuits across PG&E's service territory. The red line indicates a match between capacity and peak load, points above this line represent feeders whose peak loads already exceed the capacity of the feeder at some point in the year. Related to STAR Methods.*

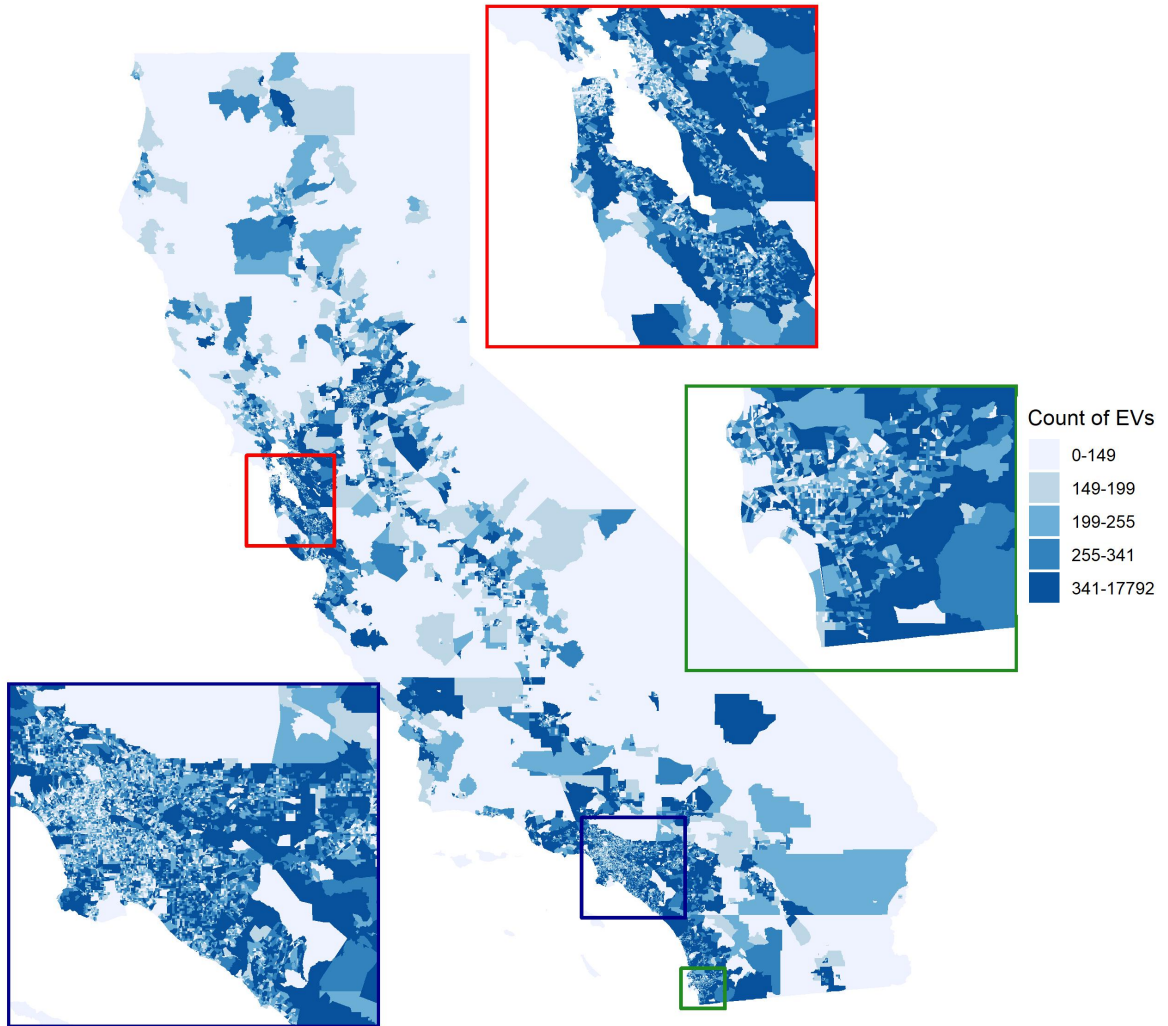

Figure S2: Sample output from EV Toolbox for 6 million EVs in California with a 75% BEV to 25% PHEV split. The EV adoption is provided at the census block group level. Related to STAR Methods.
